# Supplementary material
Source: PubMed Central journal article supplement (PMC6230998)
Supplement: CEI-194-315-s001.pdf [file CEI-194-315-s001.pdf]

**Supplementary Table 1**

| <b>Gene</b>    | <b>p value<sup>1</sup></b> | <b>Fold Change<sup>2</sup></b> | <b>GO term</b>                       |
|----------------|----------------------------|--------------------------------|--------------------------------------|
| <i>Bad</i>     | 1,9E-02                    | -1,1                           | Regulation of B Cell differentiation |
| <i>CD24a</i>   | 5,0E-03                    | 1,2                            | Regulation of B Cell differentiation |
| <i>Cyld</i>    | 1,2E-02                    | 1,1                            | Regulation of B Cell differentiation |
| <i>Flt3</i>    | 4,6E-03                    | -1,2                           | Regulation of B Cell differentiation |
| <i>Ikzf3</i>   | 2,0E-02                    | 1,1                            | Regulation of B Cell differentiation |
| <i>Il2rg</i>   | 1,0E-02                    | -1,1                           | Regulation of B Cell differentiation |
| <i>Nckap1l</i> | 4,5E-04                    | 1,1                            | Regulation of B Cell differentiation |
| <i>Ptpnc</i>   | 1,4E-02                    | 1,1                            | Regulation of B Cell differentiation |
| <i>Zfp3612</i> | 2,4E-02                    | -1,4                           | Regulation of B Cell differentiation |
| <i>Ikzf1</i>   | 6,9E-03                    | 1,1                            | Cell cycle<br>B Cell differentiation |
| <i>Ptpn6</i>   | 1,7E-02                    | 1,1                            | Cell cycle<br>B Cell differentiation |
| <i>Actr2</i>   | 3,8E-02                    | 1,1                            | Cell cycle                           |
| <i>Ahctf1</i>  | 3,0E-02                    | 1,1                            | Cell cycle                           |
| <i>Anapc11</i> | 6,5E-02                    | -1,1                           | Cell cycle                           |
| <i>Apex2</i>   | 4,2E-02                    | 1,1                            | Cell cycle                           |
| <i>Appl1</i>   | 6,2E-02                    | 1,0                            | Cell cycle                           |
| <i>Arl8a</i>   | 6,2E-02                    | -1,1                           | Cell cycle                           |
| <i>Aurka</i>   | 1,5E-02                    | -1,1                           | Cell cycle                           |
| <i>Aurkb</i>   | 3,7E-02                    | -1,1                           | Cell cycle                           |
| <i>Azi2</i>    | 7,9E-03                    | -1,1                           | Cell cycle                           |
| <i>Becn1</i>   | 6,4E-02                    | 1,1                            | Cell cycle                           |
| <i>Blcap</i>   | 3,0E-02                    | 1,1                            | Cell cycle                           |
| <i>Brcal</i>   | 7,1E-02                    | -1,1                           | Cell cycle                           |
| <i>Cables1</i> | 3,5E-02                    | -1,1                           | Cell cycle                           |
| <i>Ccnb2</i>   | 5,1E-02                    | -1,2                           | Cell cycle                           |
| <i>Ccne2</i>   | 2,5E-02                    | -1,1                           | Cell cycle                           |
| <i>Ccnf</i>    | 1,8E-02                    | -1,1                           | Cell cycle                           |
| <i>Ccnk</i>    | 2,1E-02                    | -1,2                           | Cell cycle                           |
| <i>Cdc14a</i>  | 3,0E-02                    | 1,1                            | Cell cycle                           |
| <i>Cdc25b</i>  | 1,9E-02                    | -1,3                           | Cell cycle                           |
| <i>Cdc73</i>   | 2,0E-02                    | 1,1                            | Cell cycle                           |
| <i>Cdca8</i>   | 4,0E-02                    | -1,1                           | Cell cycle                           |
| <i>Cdk6</i>    | 2,2E-03                    | 1,4                            | Cell cycle                           |
| <i>Cdkn1a</i>  | 4,3E-02                    | -1,1                           | Cell cycle                           |
| <i>Cdkn2b</i>  | 8,0E-03                    | -1,2                           | Cell cycle                           |
| <i>Cdt1</i>    | 4,9E-02                    | -1,2                           | Cell cycle                           |
| <i>Cenpe</i>   | 5,4E-02                    | -1,2                           | Cell cycle                           |
| <i>Chek1</i>   | 9,5E-03                    | -1,1                           | Cell cycle                           |
| <i>Chtf8</i>   | 4,5E-02                    | -1,1                           | Cell cycle                           |
| <i>Cib1</i>    | 4,3E-02                    | -1,1                           | Cell cycle                           |
| <i>Cltc</i>    | 7,3E-03                    | 1,1                            | Cell cycle                           |

|                   |         |      |            |
|-------------------|---------|------|------------|
| <i>Cntrob</i>     | 5,9E-03 | -1,1 | Cell cycle |
| <i>Dctn3</i>      | 4,3E-02 | -1,1 | Cell cycle |
| <i>Dlgap5</i>     | 4,6E-02 | -1,1 | Cell cycle |
| <i>Dsn1</i>       | 2,0E-02 | -1,1 | Cell cycle |
| <i>E2f1</i>       | 7,3E-02 | -1,1 | Cell cycle |
| <i>E2f4</i>       | 4,9E-02 | -1,2 | Cell cycle |
| <i>Ect2</i>       | 7,1E-02 | -1,1 | Cell cycle |
| <i>Epb4.1</i>     | 6,9E-03 | -1,1 | Cell cycle |
| <i>EPB4.1L2</i>   | 5,2E-02 | 1,1  | Cell cycle |
| <i>Ercc6l</i>     | 5,6E-02 | -1,1 | Cell cycle |
| <i>Evi5</i>       | 1,4E-02 | 1,2  | Cell cycle |
| <i>Fbxo5</i>      | 7,0E-02 | 1,1  | Cell cycle |
| <i>Foxm1</i>      | 1,7E-02 | -1,1 | Cell cycle |
| <i>Foxn3</i>      | 3,3E-02 | 1,1  | Cell cycle |
| <i>Gadd45gip1</i> | 7,1E-02 | -1,1 | Cell cycle |
| <i>Gas2</i>       | 9,9E-03 | 1,1  | Cell cycle |
| <i>Haus4</i>      | 2,8E-02 | -1,1 | Cell cycle |
| <i>Hepacam2</i>   | 2,3E-05 | -1,5 | Cell cycle |
| <i>Khdrbs1</i>    | 1,7E-02 | 1,1  | Cell cycle |
| <i>Kif18b</i>     | 3,8E-02 | -1,1 | Cell cycle |
| <i>Kif23</i>      | 2,3E-02 | -1,1 | Cell cycle |
| <i>Kif2c</i>      | 3,4E-02 | -1,1 | Cell cycle |
| <i>Lig1</i>       | 1,4E-02 | -1,1 | Cell cycle |
| <i>Map2k1</i>     | 4,6E-02 | 1,1  | Cell cycle |
| <i>Map9</i>       | 2,4E-02 | -1,1 | Cell cycle |
| <i>Mapk12</i>     | 3,7E-02 | -1,1 | Cell cycle |
| <i>Mis18bp1</i>   | 1,6E-02 | -1,1 | Cell cycle |
| <i>Mnat1</i>      | 5,1E-02 | 1,2  | Cell cycle |
| <i>Mnd1</i>       | 1,8E-02 | 1,1  | Cell cycle |
| <i>Mns1</i>       | 8,3E-03 | -1,1 | Cell cycle |
| <i>Ncapd3</i>     | 7,1E-02 | -1,1 | Cell cycle |
| <i>Ncaph</i>      | 5,2E-02 | -1,2 | Cell cycle |
| <i>Ndc80</i>      | 6,5E-03 | -1,2 | Cell cycle |
| <i>Nedd9</i>      | 4,0E-02 | 1,1  | Cell cycle |
| <i>Nr2c2</i>      | 2,7E-02 | 1,1  | Cell cycle |
| <i>Nsmce2</i>     | 3,7E-02 | 1,1  | Cell cycle |
| <i>Nup88</i>      | 1,1E-02 | 1,1  | Cell cycle |
| <i>Oip5</i>       | 3,0E-02 | -1,1 | Cell cycle |
| <i>Pcnp</i>       | 5,9E-02 | -1,1 | Cell cycle |
| <i>Pdcd6ip</i>    | 3,8E-02 | -1,1 | Cell cycle |
| <i>Pim3</i>       | 2,1E-02 | -1,1 | Cell cycle |
| <i>Pin1</i>       | 6,4E-02 | -1,1 | Cell cycle |
| <i>Pmf1</i>       | 4,6E-02 | -1,1 | Cell cycle |
| <i>Ppp2r2c</i>    | 2,7E-02 | -1,0 | Cell cycle |
| <i>Ppp2r2d</i>    | 5,9E-02 | 1,0  | Cell cycle |
| <i>Prdm9</i>      | 1,4E-02 | 1,1  | Cell cycle |
| <i>Prkce</i>      | 1,9E-02 | 1,2  | Cell cycle |

|                |         |      |                                                                                                           |
|----------------|---------|------|-----------------------------------------------------------------------------------------------------------|
| <i>Rad50</i>   | 3,4E-02 | -1,1 | Cell cycle                                                                                                |
| <i>Rad51</i>   | 4,4E-02 | -1,1 | Cell cycle                                                                                                |
| <i>Rcbtb1</i>  | 9,7E-03 | 1,1  | Cell cycle                                                                                                |
| <i>Rif1</i>    | 2,7E-02 | 1,1  | Cell cycle                                                                                                |
| <i>Rnf8</i>    | 5,4E-02 | 1,0  | Cell cycle                                                                                                |
| <i>Setd8</i>   | 1,9E-02 | -1,2 | Cell cycle                                                                                                |
| <i>Sgoll</i>   | 5,9E-02 | -1,1 | Cell cycle                                                                                                |
| <i>Siah2</i>   | 6,6E-02 | -1,5 | Cell cycle                                                                                                |
| <i>Sik1</i>    | 7,1E-02 | -1,5 | Cell cycle                                                                                                |
| <i>Ska3</i>    | 2,5E-02 | -1,1 | Cell cycle                                                                                                |
| <i>Son</i>     | 2,5E-02 | 1,1  | Cell cycle                                                                                                |
| <i>Spdl1</i>   | 2,3E-02 | -1,1 | Cell cycle                                                                                                |
| <i>Spin1</i>   | 7,1E-02 | 1,1  | Cell cycle                                                                                                |
| <i>Stag1</i>   | 6,2E-03 | 1,1  | Cell cycle                                                                                                |
| <i>Stra13</i>  | 1,7E-03 | -1,2 | Cell cycle                                                                                                |
| <i>Stra8</i>   | 6,6E-02 | 1,1  | Cell cycle                                                                                                |
| <i>Suv39h2</i> | 6,7E-03 | -1,1 | Cell cycle                                                                                                |
| <i>Tbcd</i>    | 6,2E-03 | 1,1  | Cell cycle                                                                                                |
| <i>Thap1</i>   | 7,3E-02 | -1,1 | Cell cycle                                                                                                |
| <i>Tlkl</i>    | 1,2E-02 | 1,1  | Cell cycle                                                                                                |
| <i>Tpr</i>     | 7,2E-02 | -1,1 | Cell cycle                                                                                                |
| <i>Trim21</i>  | 5,5E-06 | 1,6  | Cell cycle                                                                                                |
| <i>Trp53</i>   | 6,4E-02 | -1,1 | Cell cycle                                                                                                |
| <i>Tubgcp5</i> | 1,0E-02 | 1,1  | Cell cycle                                                                                                |
| <i>Usp9x</i>   | 1,4E-02 | 1,1  | Cell cycle                                                                                                |
| <i>Vps4b</i>   | 6,4E-02 | 1,1  | Cell cycle                                                                                                |
| <i>Vrk1</i>    | 3,0E-02 | 1,1  | Cell cycle                                                                                                |
| <i>Xrn1</i>    | 6,8E-02 | 1,1  | Cell cycle                                                                                                |
| <i>Cyp51</i>   | 4,6E-02 | 1,4  | Sterol biosynthetic process                                                                               |
| <i>Sc5d</i>    | 5,1E-02 | 1,2  | Sterol biosynthetic process                                                                               |
| <i>Fdft1</i>   | 3,6E-02 | 1,2  | Sterol biosynthetic process                                                                               |
| <i>Sc4mol</i>  | 1,1E-02 | 1,6  | Sterol biosynthetic process                                                                               |
| <i>Sqle</i>    | 2,8E-02 | 1,5  | Sterol biosynthetic process                                                                               |
| <i>Apoe</i>    | 5,0E-04 | -1,9 | Sterol biosynthetic process<br>Cholesterol biosynthetic process<br>Secondary alcohol biosynthetic process |
| <i>Dhcr24</i>  | 8,7E-04 | 1,4  | Sterol biosynthetic process<br>Cholesterol biosynthetic process<br>Secondary alcohol biosynthetic process |
| <i>Fdps</i>    | 1,5E-02 | 1,3  | Sterol biosynthetic process<br>Cholesterol biosynthetic process<br>Secondary alcohol biosynthetic process |
| <i>Hmgcr</i>   | 1,8E-02 | 1,3  | Sterol biosynthetic process<br>Cholesterol biosynthetic process<br>Secondary alcohol biosynthetic process |
| <i>Hmgcs1</i>  | 1,2E-02 | 1,8  | Sterol biosynthetic process                                                                               |

|                |         |     |                                        |
|----------------|---------|-----|----------------------------------------|
| <i>Hsd17b7</i> | 1,0E-02 | 1,2 | Cholesterol biosynthetic process       |
|                |         |     | Secondary alcohol biosynthetic process |
|                |         |     | Sterol biosynthetic process            |
| <i>Insig1</i>  | 1,5E-02 | 1,6 | Cholesterol biosynthetic process       |
|                |         |     | Secondary alcohol biosynthetic process |
|                |         |     | Sterol biosynthetic process            |
| <i>Lss</i>     | 1,2E-02 | 1,3 | Cholesterol biosynthetic process       |
|                |         |     | Secondary alcohol biosynthetic process |
|                |         |     | Sterol biosynthetic process            |
| <i>Mvk</i>     | 5,8E-03 | 1,1 | Cholesterol biosynthetic process       |
|                |         |     | Secondary alcohol biosynthetic process |
|                |         |     | Sterol biosynthetic process            |

---

GO = Gene ontology

<sup>1</sup>p value from a comparative marker selection

<sup>2</sup>Fold change based on non-transformed values
